# Supplementary material for: Challenges in Caring for People with Cardiovascular Disease through and beyond the COVID-19 Pandemic: The Advantages of Universal Access to Home Telemonitoring
Source: MDPI journal article supplement (doi:10.3390/healthcare11121727), 2023-06-12
Supplement: s1 [file s1]

**Table S1.** Comparison of total cholesterol values between study periods.

| Total cholesterol<br>(mg/dl) | Lock<br>1 march 2020 – 1 sept 2020                                                  | Restr-P<br>1 sept 2020 - 1 march 2021                                                  | Rel-P<br>1 march 2021 - 1 march 2022                                                   |
|------------------------------|-------------------------------------------------------------------------------------|----------------------------------------------------------------------------------------|----------------------------------------------------------------------------------------|
| Pre-P                        | Pre-P: 183.05± 48.196<br>Lock: 216.72± 54.194<br>N=1703<br><b>P_value= 0.000001</b> | Pre-P: 181.98± 47.965<br>Restr-P: 218.98± 59.211<br>N=1849<br><b>P_value= 0.000001</b> | Pre-P: 187.06± 47.239<br>Rel-P: 180.04± 46.030<br>N=1332<br><b>P_value= 0.000001</b>   |
| Lock                         | X                                                                                   | Lock: 221.93± 54.487<br>Restr-P: 226.79± 61.673<br>N=1327<br><b>P_value= 0.000001</b>  | Lock: 223.35± 54.310<br>Rel-P: 180.23± 46.139<br>N=1254<br><b>P_value= 0.000001</b>    |
| Restr-P                      | X                                                                                   | X                                                                                      | Restr-P: 227.82± 61.458<br>Rel-P: 180.00± 46.167<br>N=1303<br><b>P_value= 0.000001</b> |

Pre-P- prepandemic; Restr-P- restrictive pandemic; Rel-P- relaxed pandemic; Lock- lockdown.

**Table S2.** Comparison of LDL-cholesterol values between study periods.

| LDL cholesterol<br>mg/dl | Lock<br>1 march 2020 – 1 sept 2020                                                  | Restr-P<br>1 sept 2020 - 1 march 2021                                                  | Rel-P<br>1 march 2021 - 1 march 2022                                                   |
|--------------------------|-------------------------------------------------------------------------------------|----------------------------------------------------------------------------------------|----------------------------------------------------------------------------------------|
| Pre-P                    | Pre-P: 113.21± 41.046<br>Lock: 136.75± 43.602<br>N=1557<br><b>P_value= 0.000001</b> | Pre-P: 112.18± 40.582<br>Restr-P: 137.57± 45.620<br>N=1649<br><b>P_value= 0.000001</b> | Pre-P: 116.55± 40.145<br>Rel-P: 112.39± 40.470<br>N=1278<br><b>P_value= 0.000001</b>   |
| Lock                     | X                                                                                   | Lock: 136.65± 45.289<br>Restr-P: 138.82± 47.991<br>N=1263<br><b>P_value= 0.001519</b>  | Lock: 138.36± 44.411<br>Rel-P: 112.25± 40.969<br>N=1216<br><b>P_value= 0.000001</b>    |
| Restr-P                  | X                                                                                   | X                                                                                      | Restr-P: 140.17± 47.752<br>Rel-P: 111.50± 40.640<br>N=1244<br><b>P_value= 0.000001</b> |

LDL- low density lipoprotein; Pre-P- prepandemic; Restr-P- restrictive pandemic; Rel-P- relaxed pandemic; Lock- lockdown.

**Table S3.** Comparison of HDL-cholesterol values between study periods.

| HDL-cholesterol<br>(mg/dl) | Lock<br>1 march 2020 – 1 sept 2020 | Restr-P<br>1 sept 2020 - 1 march 2021 | Rel-P<br>1 march 2021 - 1 march 2022 |
|----------------------------|------------------------------------|---------------------------------------|--------------------------------------|
| Pre-P                      | Pre-P: 52.58± 9.911                | Pre-P: 52.89± 9.988                   | Pre-P: 50.97± 10.188                 |
|                            | Lock: 47.90± 13.815                | Restr-P: 45.23± 13.829                | Rel-P: 57.81± 14.620                 |
|                            | N=1567                             | N=1675                                | N=1347                               |
|                            | <b>P_value= 0.000001</b>           | <b>P_value= 0.000001</b>              | <b>P_value= 0.000001</b>             |
| Lock                       | X                                  | Lock: 47.63± 15.969                   | Lock: 47.38± 16.448                  |
|                            |                                    | Restr-P: 43.31± 14.027                | Rel-P: 57.28± 14.153                 |
|                            |                                    | N=1243                                | N=1219                               |
|                            |                                    | <b>P_value= 0.000001</b>              | <b>P_value= 0.000001</b>             |
| Restr-P                    | X                                  | X                                     | Restr-P: 42.56± 13.967               |
|                            |                                    |                                       | Rel-P: 58.11± 15.000                 |
|                            |                                    |                                       | N=1295                               |
|                            |                                    |                                       | <b>P_value= 0.000001</b>             |

HDL- high density lipoprotein; Pre-P- prepandemic; Restr-P- restrictive pandemic; Rel-P- relaxed pandemic; Lock- lockdown.

**Table S4.** Comparison of TGL values between study periods.

| TGL<br>(mg/dl) | Lock<br>1 march 2020 – 1 sept 2020 | Restr-P<br>1 sept 2020 - 1 march 2021 | Rel-P<br>1 march 2021 - 1 march 2022 |
|----------------|------------------------------------|---------------------------------------|--------------------------------------|
| Pre-P          | Pre-P: 121.83± 76.590              | Pre-P: 120.10± 68.755                 | Pre-P: 124.70± 67.988                |
|                | Lock: 158.29± 68.000               | Restr-P: 174.72± 64.205               | Rel-P: 126.46± 59.727                |
|                | N=1666                             | N=1795                                | N=1321                               |
|                | <b>P_value= 0.000001</b>           | <b>P_value= 0.000001</b>              | <b>P_value= 0.122975</b>             |
| Lock           | X                                  | Lock: 159.22± 64.172                  | Lock: 160.12± 64.954                 |
|                |                                    | Restr-P: 177.37± 63.033               | Rel-P: 125.75± 60.144                |
|                |                                    | N=1300                                | N=1243                               |
|                |                                    | <b>P_value= 0.000001</b>              | <b>P_value= 0.000001</b>             |
| Restr-P        | X                                  | X                                     | Restr-P: 177.96± 63.577              |
|                |                                    |                                       | Rel-P: 126.38± 60.159                |
|                |                                    |                                       | N=1284                               |
|                |                                    |                                       | <b>P_value= 0.000001</b>             |

TGL- triglycerides; Pre-P- prepandemic; Restr-P- restrictive pandemic; Rel-P- relaxed pandemic; Lock- lockdown.

**Table S5.** Comparison of mean glucose levels between study periods.

| Glucose (mg/dl) | Lock                       | Restr-P                    | Rel-P                       |
|-----------------|----------------------------|----------------------------|-----------------------------|
|                 | 1 march 2020 – 1 sept 2020 | 1 sept 2020 - 1 march 2021 | 1 march 2021 - 1 march 2022 |
| Pre-P           | Pre-P: 104.23± 28.326      | Pre-P: 103.26± 28.161      | Pre-P: 105.10± 25.720       |
|                 | Lock: 117.11± 28.738       | Restr-P: 119.68± 31.487    | Rel-P: 137.18± 32.819       |
|                 | N=1641                     | N=1760                     | N=1273                      |
|                 | <b>P_value= 0.000001</b>   | <b>P_value= 0.000001</b>   | <b>P_value= 0.000001</b>    |
| Lock            | X                          | Lock: 118.78± 27.255       | Lock: 119.32± 26.630        |
|                 |                            | Restr-P: 123.76± 30.192    | Rel-P: 138.40± 32.212       |
|                 |                            | N=1294                     | N=1203                      |
|                 |                            | <b>P_value= 0.000001</b>   | <b>P_value= 0.000001</b>    |
| Restr-P         | X                          | X                          | Restr-P: 123.99± 29.271     |
|                 |                            |                            | Rel-P: 137.16± 32.864       |
|                 |                            |                            | N=1268                      |
|                 |                            |                            | <b>P_value= 0.000001</b>    |

Pre-P- prepandemic; Restr-P- restrictive pandemic; Rel-P- relaxed pandemic; Lock- lockdown.

**Table S6.** Comparison of uric acid values between study periods.

| Uric Acid (mg/dl) | Lock                       | Restr-P                    | Rel-P                       |
|-------------------|----------------------------|----------------------------|-----------------------------|
|                   | 1 march 2020 – 1 sept 2020 | 1 sept 2020 - 1 march 2021 | 1 march 2021 - 1 march 2022 |
| Pre-P             | Pre-P: 5.26± 1.554         | Pre-P: 5.29± 4.139         | Pre-P: 5.39± 1.526          |
|                   | Lock: 6.12± 2.716          | Restr-P: 6.18± 1.797       | Rel-P: 5.80± 2.919          |
|                   | N=1430                     | N=1513                     | N=1142                      |
|                   | <b>P_value= 0.000001</b>   | <b>P_value= 0.000001</b>   | <b>P_value= 0.000001</b>    |
| Lock              | X                          | Lock: 6.26± 2.947          | Lock: 6.25± 2.975           |
|                   |                            | Restr-P: 6.41± 1.818       | Rel-P: 5.79± 2.957          |
|                   |                            | N=1120                     | N=1093                      |
|                   |                            | <b>P_value= 0.072092</b>   | <b>P_value= 0.000001</b>    |
| Restr-P           | X                          | X                          | Restr-P: 6.44± 1.809        |
|                   |                            |                            | Rel-P: 5.82± 2.975          |
|                   |                            |                            | N=1085                      |
|                   |                            |                            | <b>P_value= 0.000001</b>    |

Pre-P- prepandemic; Restr-P- restrictive pandemic; Rel-P- relaxed pandemic; Lock- lockdown.

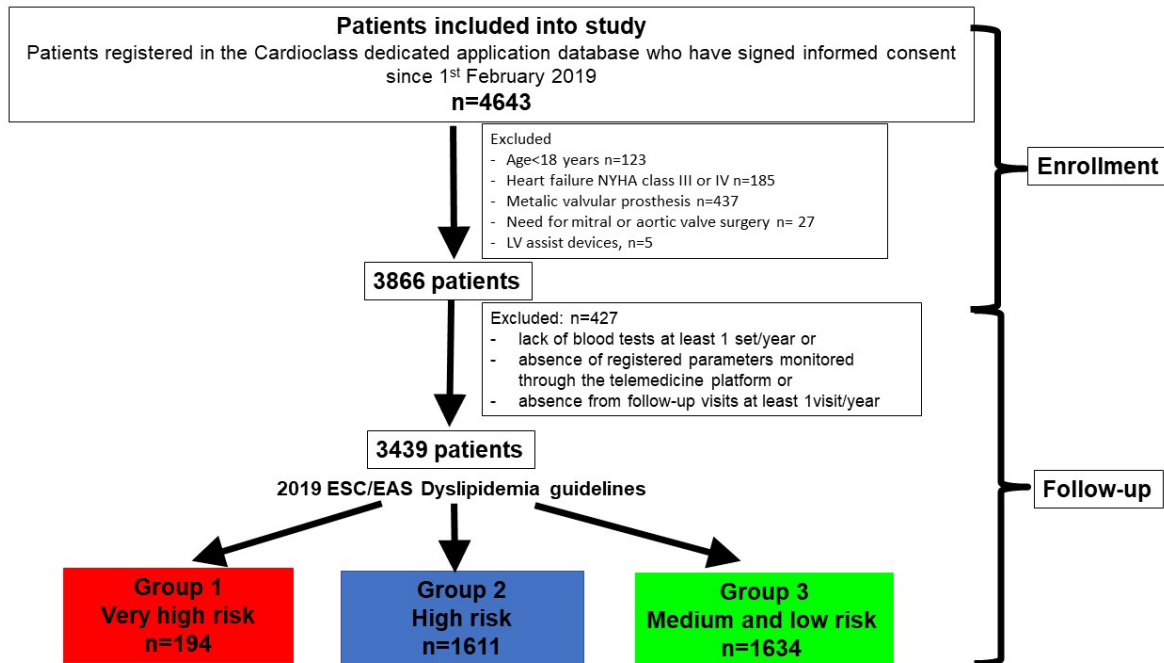

Figure S1. Study flow-chart.
